# Supplementary material
Source: PubMed Central journal article supplement (PMC6178955)
Supplement: NIHMS991003-supplement-1.pdf [file NIHMS991003-supplement-1.pdf]

Supplementary information for:

**Protein engineering reveals mechanisms of functional amyloid formation in *Pseudomonas aeruginosa* biofilms**

**Alissa Bleem, Gunna Christiansen, Daniel J. Madsen, Hans Maric, Kristian Strømgaard, James D. Bryers, Valerie Daggett, Rikke L. Meyer, and Daniel E. Otzen**

## SI Methods

### Peptide microarray methods to supplement the protocol found in the main text:

For evaluation in microarray format, peptides were synthesized in parallel using a ResPep SL synthesis robot (Intavis AG, Cologne, Germany) equipped with a Celluspot synthesis module and printed using a slide spotting robot (Intavis AG). Coupling reagents were freshly prepared every 48 h. Synthesis was based on Standard Fluorenylmethoxycarbonyl (Fmoc) peptide synthesis using reagents from Sigma-Aldrich (St. Louis, MO) and Iris (Marktredwitz, Germany) and performed on acid-soluble Fmoc- $\beta$ -Alanine etherified cellulose disks (area 0.12 cm<sup>2</sup>, loading 1.0  $\mu$ mol cm<sup>-2</sup>). N-terminal Fmoc protection was removed by adding 2  $\mu$ L and 4  $\mu$ L 20% Piperidine in N-Methyl Pyrrolidone (NMP) for 5 and 10 min. Two couplings (each 40 min) using Oxyma/N,N'-Diisopropylcarbodiimide/Amino Acid in the relation (1.1/1.5/1.0) in at least 5-fold excess followed by two washing steps (100  $\mu$ L and 300  $\mu$ L NMP) and 4  $\mu$ L capping solution (5% Acetic Anhydride in NMP) achieved peptide elongation by one amino acid. The subsequent peptide work-up was performed manually on all peptides in parallel after transfer of the cellulose disks into 96 deep-well blocks. Peptide side-chain deprotection was achieved with 150  $\mu$ L deprotection solution (trifluoroacetic acid (TFA)/triisopropylsilane (TIPS)/water/DCM: 80%, 3%, 5%, 12%) for 2 h. Disks were then solubilized overnight in 250  $\mu$ L of cellulose solvation solution (TFA/trifluoromethanesulfonic acid/TIPS/water: 88.5%, 4%, 2.5%, 5%) under strong agitation. 750  $\mu$ L diethyl ether (DE, -20°C) was added to the dissolved cellulose-peptide conjugates and the mixture was briefly agitated and kept at -20°C for 1 h. Precipitated conjugates were pelleted by centrifugation at 2000 xg for 30 min at 4°C. After removal of the supernatant the pellet was additionally washed twice with 750  $\mu$ L fresh DE (-20°C). After the final washing step, residual ether was evaporated and 250  $\mu$ L of dimethyl sulfoxide (DMSO) was added to re-solvate the cellulose-peptide conjugates. The cellulose-peptide conjugate stock solutions were stored at -20°C. Prior to printing 80  $\mu$ L of the stocks were transferred to a 384-well plate and mixed with 20  $\mu$ L SSC buffer (150  $\mu$ M NaCl; 15  $\mu$ M Na<sub>3</sub>C<sub>6</sub>H<sub>5</sub>O<sub>7</sub>; pH 7.0). 50 nL of each peptide was contact printed on coated glass slides with a slide spotting robot (Intavis AG) and dried overnight.

**SI Table 1.** Sequence analysis of GVN<sub>X</sub>AA hexapeptides in R1, R2, and R3.

| Strain                                   | NCBI Reference | R1 motif | %ID to PAO1 (GVNVAA) | R2 motif | %ID to PAO1 (GVNVAA) | R3 motif | %ID to PAO1 (GVNIAA) |
|------------------------------------------|----------------|----------|----------------------|----------|----------------------|----------|----------------------|
| <i>Pseudomonas aeruginosa</i> PAO1       | NP_250644.1    | GVNVAA   |                      | GVNVAA   |                      | GVNIAA   |                      |
| <i>Pseudomonas putida</i> GB-1           | WP_012272553.1 | GINVAA   | 83.33                | GINIAG   | 50                   | GVNVAA   | 83.33                |
| <i>Pseudomonas putida</i> F1             | WP_012052566.1 | GINVAA   | 83.33                | GINVAG   | 66.67                | GVNVAA   | 83.33                |
| <i>Pseudomonas putida</i> BIRD-1         | WP_014591276.1 | GINVAA   | 83.33                | GINVAG   | 66.67                | GVNVAA   | 83.33                |
| <i>Pseudomonas putida</i> KT2440         | NP_745000.1    | GINVAA   | 83.33                | GINVAG   | 66.67                | GVNVAA   | 83.33                |
| <i>Pseudomonas entomophila</i> L48       | WP_011534103.1 | GVNVAA   | 100                  | GINIAG   | 50                   | GVNVAA   | 83.33                |
| <i>Pseudomonas putida</i> W619           | WP_012314614.1 | GVNVAA   | 100                  | GINVAG   | 66.67                | GVNVAA   | 83.33                |
| <i>Pseudomonas sp.</i> UK4               | EEP64551.1     | GANIAA   | 66.67                | GVNVAA   | 100                  | GVNVAA   | 83.33                |
| <i>Pseudomonas fluorescens</i> A506      | WP_003190893.1 | GVNAQS   | 50                   | GYNGQA   | 50                   | GVNLQS   | 50                   |
| <i>Pseudomonas fluorescens</i> SBW25     | WP_012723889.1 | GVNVQA   | 83.33                | GYNGQA   | 50                   | GVNLQS   | 50                   |
| <i>Pseudomonas fluorescens</i> WH6       | ZP_07775110.1  | GVNVQA   | 83.33                | GYNGQA   | 50                   | GVNLQS   | 50                   |
| <i>Pseudomonas synxantha</i> BG33R       | ZP_10141134.1  | GVNVQS   | 66.67                | GYNGQS   | 33.33                | GVNLQS   | 50                   |
| <i>Pseudomonas sp.</i> S9                | ZP_09711309.1  | GINVVA   | 66.67                | GANVAA   | 83.33                | GVNVAA   | 83.33                |
| <i>Pseudomonas aeruginosa</i> 2192       | ZP_04933660.1  | GVNVAA   | 100                  | GVNVAA   | 100                  | GVNIAA   | 100                  |
| <i>Pseudomonas aeruginosa</i> C3719      | ZP_04928363.1  | GVNVAA   | 100                  | GVNVAA   | 100                  | GVNIAA   | 100                  |
| <i>Pseudomonas aeruginosa</i> LESB58     | WP_003113480.1 | GVNVAA   | 100                  | GVNVAA   | 100                  | GVNIAA   | 100                  |
| <i>Pseudomonas aeruginosa</i> PACS2      | ZP_01365301.1  | GVNVAA   | 100                  | GVNVAA   | 100                  | GVNIAA   | 100                  |
| <i>Pseudomonas putida</i> S16            | WP_013972458.1 | GVNVAA   | 100                  | GINIAG   | 50                   | GVNVAA   | 83.33                |
| <i>Pseudomonas aeruginosa</i> 39016      | ZP_07797129.1  | GVNVAA   | 100                  | GVNVAA   | 100                  | GVNIAA   | 100                  |
| <i>Pseudomonas aeruginosa</i> DK2        | WP_003088317.1 | GVNVAA   | 100                  | GVNVAA   | 100                  | GVNIAA   | 100                  |
| <i>Pseudomonas aeruginosa</i> NCGM2.S1   | WP_003088317.1 | GVNVAA   | 100                  | GVNVAA   | 100                  | GVNIAA   | 100                  |
| <i>Pseudomonas aeruginosa</i> PAb1       | ZP_06879114.1  | GVNVAA   | 100                  | GVNVAA   | 100                  | GVNIAA   | 100                  |
| <i>Pseudomonas aeruginosa</i> UCBPP-PA14 | WP_003088317.1 | GVNVAA   | 100                  | GVNVAA   | 100                  | GVNIAA   | 100                  |
| <i>Pseudomonas sp.</i> 2_1_26            | ZP_09055487.1  | GVNVAA   | 100                  | GVNVAA   | 100                  | GVNIAA   | 100                  |
| <i>Pseudomonas aeruginosa</i> M18        | WP_003121980.1 | GVNVAA   | 100                  | GVNVAA   | 100                  | GVNIAA   | 100                  |
| <i>Pseudomonas sp.</i> M47T1             | ZP_10148953.1  | GVNVAG   | 83.33                | GINVTS   | 50                   | GANVAS   | 50                   |
| <i>Pseudomonas fluorescens</i> Pf0-1     | WP_011334011.1 | GMNNTA   | 50                   | GVNNSA   | 66.67                | GYNNAA   | 66.67                |
| <i>Pseudomonas brassicacearum</i> NFM421 | WP_003202372.1 | GANIAA   | 66.67                | GINVTA   | 66.67                | GANVSA   | 50                   |
| <i>Pseudomonas fluorescens</i> F113      | WP_014338150.1 | GANIAA   | 66.67                | GINVTA   | 66.67                | GANVSA   | 50                   |
| <i>Pseudomonas chlororaphis</i> O6       | ZP_10175099.1  | GANVAA   | 83.33                | GINVTA   | 66.67                | GANVSA   | 50                   |
| <i>Pseudomonas protegens</i> Pf-5        | WP_011061407.1 | GANVAA   | 83.33                | GINVTA   | 66.67                | GANVSA   | 50                   |
| <b>AVERAGE %ID to PAO1</b>               |                |          | <b>85.5</b>          |          | <b>75.6</b>          |          | <b>78.9</b>          |

**SI Table 2.** Bacterial strains and primers used in this study.

| Name                                          | Description                                                                  | Reference             |
|-----------------------------------------------|------------------------------------------------------------------------------|-----------------------|
| <i>P. aeruginosa</i> PAO1 WT                  | Wild-type; no mutation                                                       | -                     |
| <i>P. aeruginosa</i> PAO1 pFap                | PAO1 with pMMB90Tc-PAO1fap plasmid encoding <i>fapA-fapF</i> , Tet resistant | Dueholm et al. (2013) |
| pET30a(+) FapC<br>C304S/C307G: forward primer | CCGGGCCGCTGCTGCTACC                                                          | This study            |
| pET30a(+) FapC<br>C304S/C307G: reverse primer | CGGGTGGTGAAAGCCTGG                                                           | This study            |

**SI Table 3.** ZipperDB analysis of FapC mutants in R1, R2, R3, NC, and PC. RE = Rosetta energy. Values in *italics* indicate no change from wild-type; values in **bold** indicate change from wild-type; mutation sites (GVNXAA → KFDDTK) are underlined in the sequences below.

|         | Average RE, full sequence (kcal/mol) | Average RE in R1 (kcal/mol) | Average RE in R2 (kcal/mol) | Average RE in R3 (kcal/mol) | Change from WT, full sequence (kcal/mol) | Change from WT, within repeat (kcal/mol) |
|---------|--------------------------------------|-----------------------------|-----------------------------|-----------------------------|------------------------------------------|------------------------------------------|
| FapC WT | -21.84                               | -21.96                      | -21.59                      | -22.93                      | –                                        | –                                        |
| FapC R1 | <b>-21.72</b>                        | <b>-21.23</b>               | -21.59                      | -22.93                      | <b>+0.12</b>                             | <b>+0.73</b>                             |
| FapC R2 | -21.71                               | -21.96                      | <b>-20.65</b>               | -22.93                      | <b>+0.13</b>                             | <b>+0.94</b>                             |
| FapC R3 | <b>-21.69</b>                        | -21.96                      | -21.59                      | <b>-21.58</b>               | <b>+0.14</b>                             | <b>+1.35</b>                             |
| FapC NC | -21.79                               | -21.96                      | -21.59                      | -22.93                      | <b>+0.05</b>                             | –                                        |
| FapC PC | -21.84                               | -21.96                      | <b>-21.82</b>               | -22.93                      | <b>-0.004</b>                            | <b>-0.23</b>                             |
| FapC TM | -21.44                               | <b>-21.23</b>               | <b>-20.65</b>               | <b>-21.58</b>               | <b>+0.40</b>                             | –                                        |

**Wild-type R1 sequence:**

QQNYNNKVSNFGTLNNASVSGSIKDASGNVGVNVAAGDNNQQANAAALA

**Wild-type R2 sequence:**

QSGYGNTLNNYSNPNTASLSNSANNVSGNLGVNVAAGNFNQQKNDLAAA

**Wild-type R3 sequence:**

NNASLSNSLQNVSGNVGVNIAAGGGNQQSNSLSI

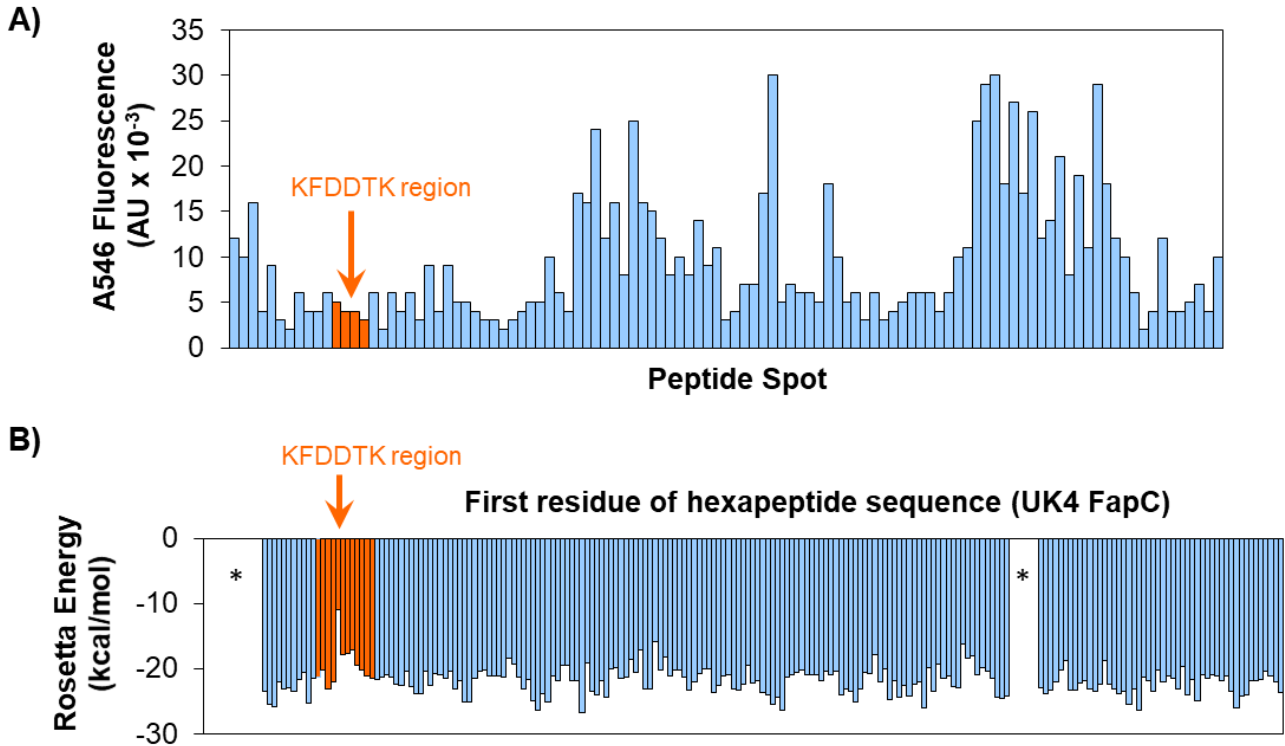

**SI Figure 1. A)** Relative fluorescence intensity of A546-labeled UK4 FapC on cellulose peptide array, plotted against each spot peptide sequence of UK4 FapC. Bars highlighted in orange indicate peptide spots containing the KFDDTK sequence. **B)** Rosetta energies for each hexapeptide segment of the UK4 FapC sequence. Candidate sequences were taken from the area shaded in orange, and the sequence KFDDTK was ultimately selected for PAO1 FapC mutations due to its combination of relatively high Rosetta energy (low amyloid propensity) and net neutral charge. \*Proline residues are incompatible with the 3D profile method in ZipperDB; hexapeptides with prolines are therefore unscored.

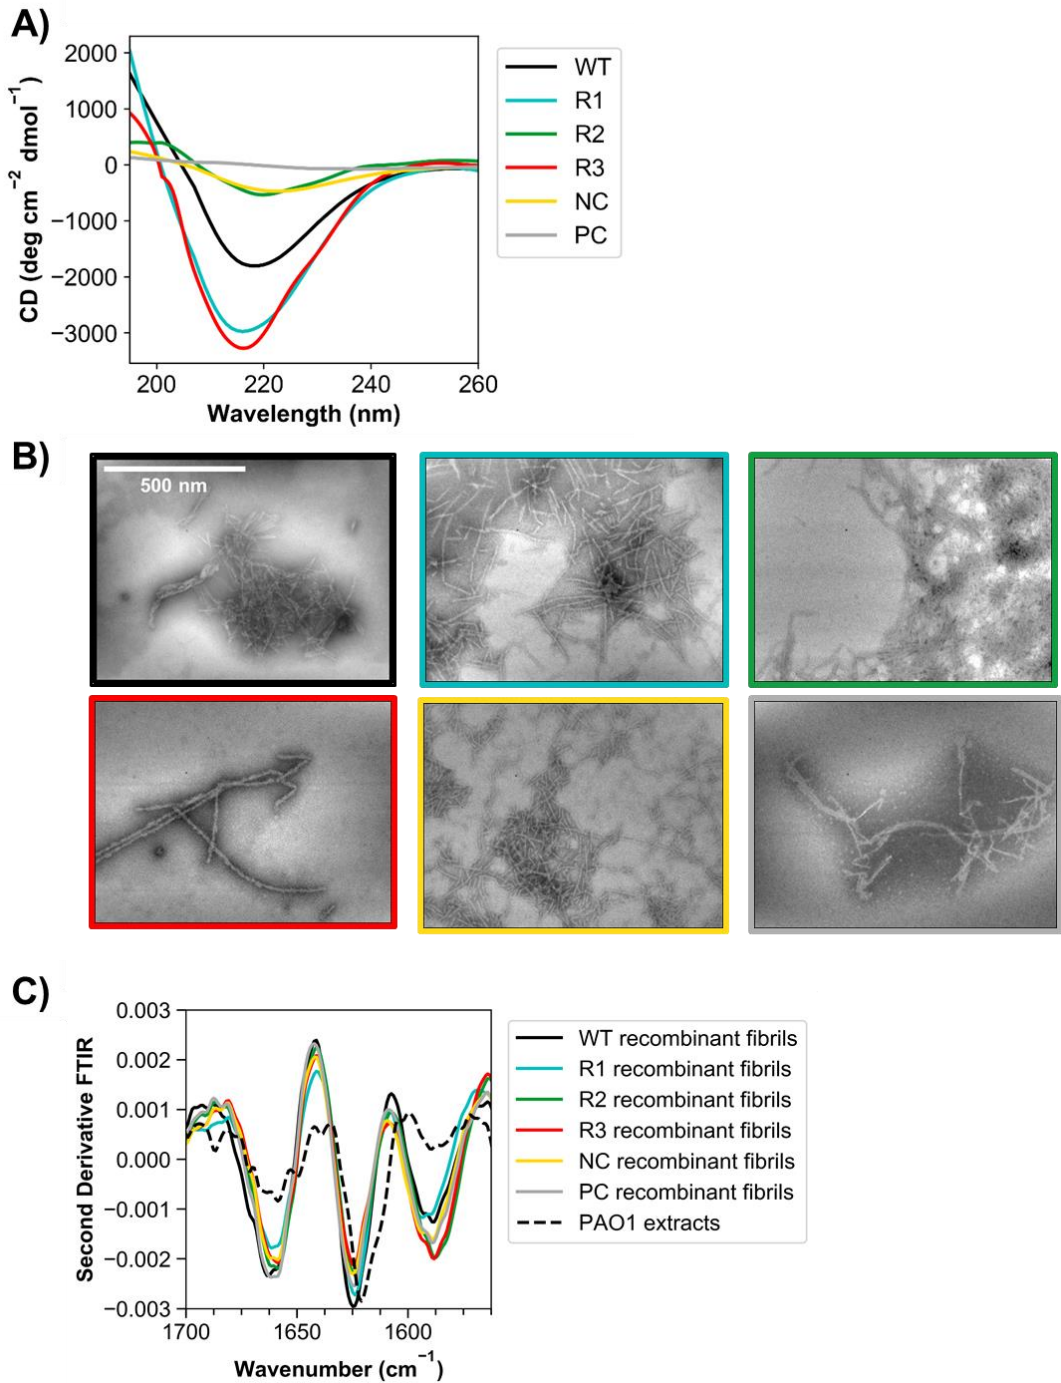

**SI Figure 2. A)** Conversion to  $\beta$ -sheet secondary structure was verified by CD for FapC WT and five mutants. The positive control, PC, has a null signal because the sample consisted almost entirely of insoluble fibrils. **B)** The presence of amyloid fibrils was also confirmed by TEM. Border colors match the legend in “A” and scale in upper left image applies to all images. **C)** FTIR comparison of recombinant FapC fibrils (solid lines) compared to FapC fibril extract (dashed line) from *P. aeruginosa* PAO1 pFap (SI Table 2). Second derivative minima at  $\sim 1625$  cm<sup>-1</sup> indicate  $\beta$ -sheet structure.

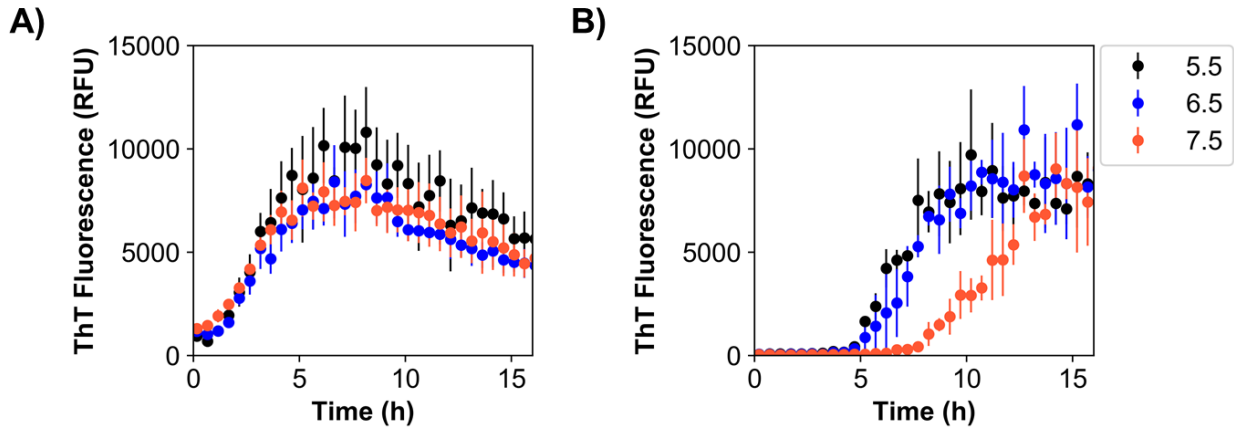

**SI Figure 3. A)** FapC WT and **B)** FapC R3 mutant were incubated with shaking at 37°C in 10 mM Tris buffer, pH 5.5 (black), 6.5 (blue), and 7.5 (orange). ThT fluorescence indicates amyloid fibril formation, and error bars represent the standard deviation from the mean of three replicates.



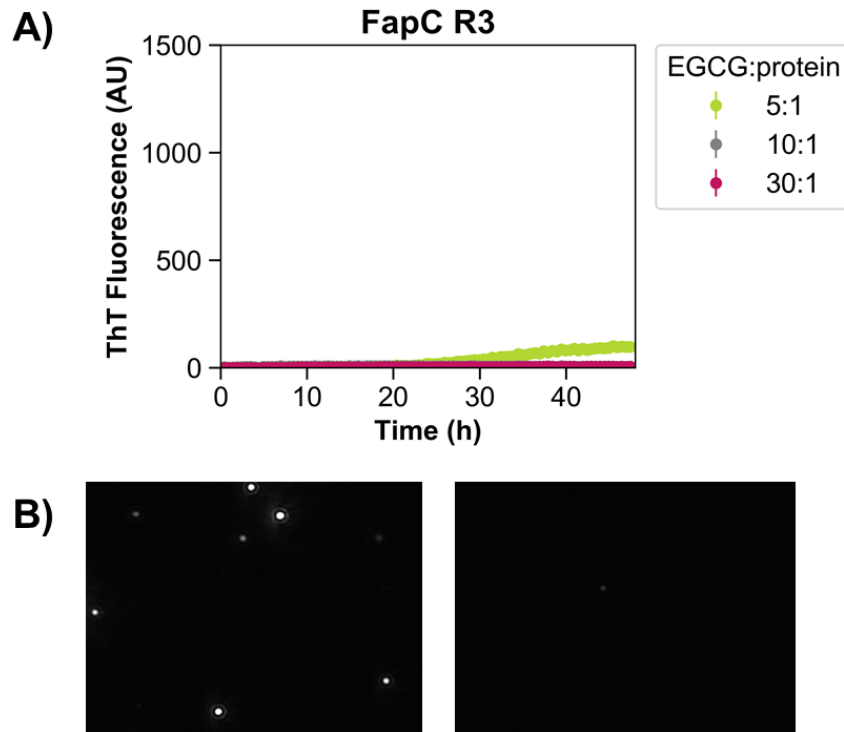

**SI Figure 4. A)** ThT fluorescence never increased above baseline for FapC R3 samples incubated with 10:1 or 30:1 molar ratio of EGCG:protein. A faint, but significant, increase in fluorescence after ~30 h indicated some weak fibrillation at a 5:1 molar ratio. **B)** NTA analysis of (*left*) 90  $\mu$ M EGCG solutions indicate some small colloidal particles when compared to (*right*) buffer alone. EGCG remains polydisperse and does not appear to form colloidal particles at lower concentrations.

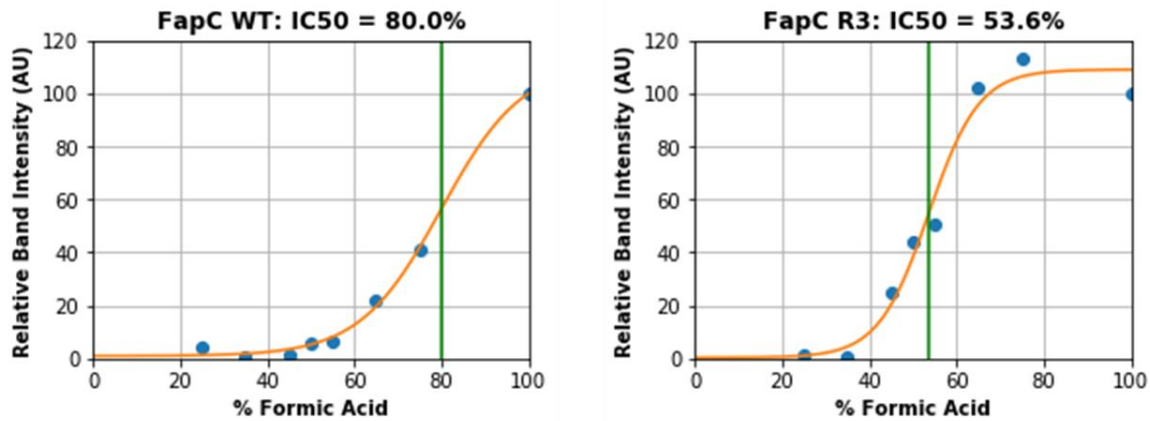

**SI Figure 5.** FA dissolution data (blue circles) from Figure 5B were regressed using least-squares regression and a sigmoidal fit (orange lines) of the form in equation (1) below. The parameter  $x_0$  defines an “IC50”, i.e. the concentration of FA at which relative band intensity reaches half-maximum (green vertical lines).

$$y = \frac{c}{1+e^{-k(x-x_0)}} + y_0 \quad (\text{Eq. 1})$$

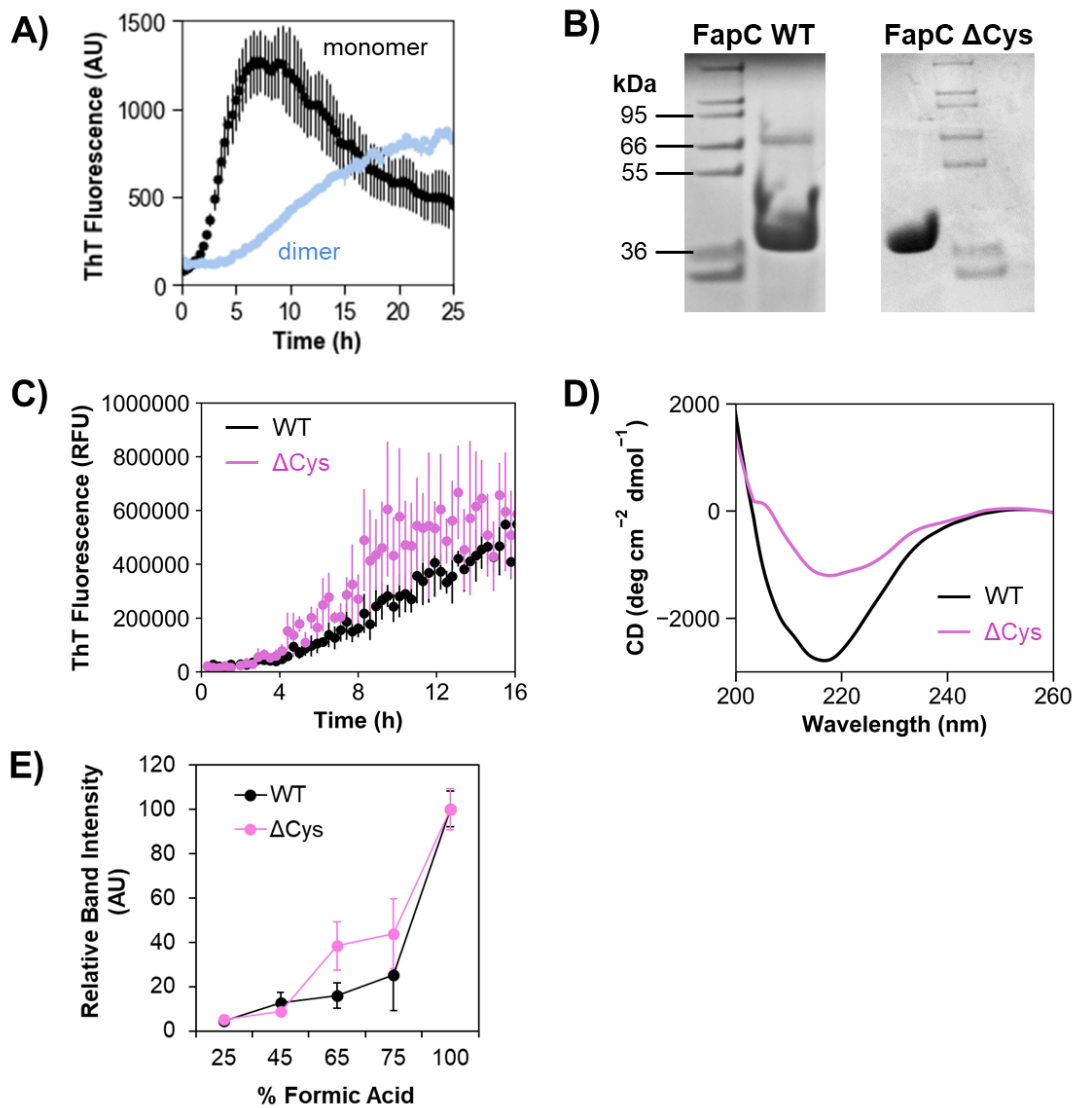

**SI Figure 6. A)** Isolated fractions of the FapC WT dimer species were pooled and concentrated to 0.5 mg/mL, and then aggregation of the dimer was tracked using ThT fluorescence. Dimer (0.5 mg/mL) is shown in blue and monomer (0.2 mg/mL) is shown for comparison in black. **B)** SDS-PAGE of purified FapC WT and ΔCys demonstrates the lack of disulfide-mediated dimers in ΔCys. Note that FapC runs slightly higher than its molecular weight of ~32 kDa; this is typical behavior for this protein on polyacrylamide gels. **C)** ThT assay to compare fibrillation profiles of FapC WT (black) and FapC ΔCys (pink). Error bars in (A) and (B) indicate standard deviation from the mean of three replicates. **D)** CD spectra for endpoint samples of FapC WT (black) and FapC ΔCys (pink) indicate conversion to β-sheet secondary structure. **E)** Formic acid treatment of WT fibrils (black) versus ΔCys fibrils (pink) demonstrates that disulfide bonding capability leads to a moderate increase in fibril stability.

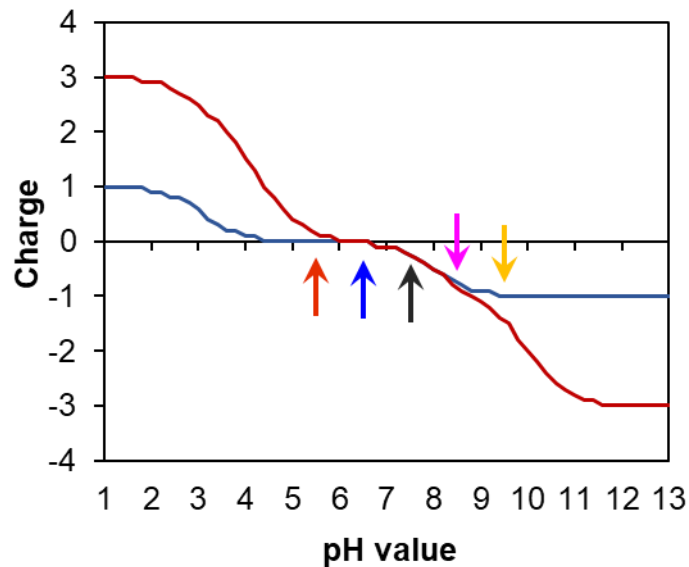

**SI Figure 7.** pH versus predicted charge state within the R3 repeat segment (residues 267-300) of FapC. Blue line = wild-type R3 sequence; red line = GVNIAA→KFDDTK mutated R3 sequence. Arrow colors correspond to pH values tested in Figure 3: red = pH 5.5, blue = pH 6.5, black = pH 7.5, pink = pH 8.5, and yellow = pH 9.5. Charges were predicted using the ThermoFisher Peptide Analyzing Tool.
